# Supplementary material for: The effect of ionic liquids on the nucleation and growth of perylene films obtained by vapor deposition
Source: Royal Society of Chemistry journal article supplement (doi:10.1039/d2ce01495e), 2022-12-30
Supplement: d2ce01495e1.pdf [file d2ce01495e1.pdf]

## **Electronic Supplementary Information (ESI)**

### ***The Effect of Ionic Liquids on the Nucleation and Growth of Perylene Films Obtained by Vapor Deposition***

José C. S. Costa,<sup>\*a</sup> Ricardo M. Campos,<sup>a</sup> Ângela C. M. Castro,<sup>a</sup> Artur F. M. Farinha,<sup>a</sup> Gonçalo N. P. Oliveira,<sup>b</sup> João P. Araújo,<sup>b</sup> Luís M. N. B. F. Santos<sup>a</sup>

<sup>a</sup> CIQUP, Institute of Molecular Sciences (IMS), Department of Chemistry and Biochemistry, Faculty of Science, University of Porto, Portugal.

\*E-mail: [jose.costa@fc.up.pt](mailto:jose.costa@fc.up.pt)

<sup>b</sup> IFIMUP, Institute of Physics for Advanced Materials, Nanotechnology and Photonics, University of Porto, Portugal.

## Index

|                                                                                                                                                                                                                                                                                                                                                                                                                      |            |
|----------------------------------------------------------------------------------------------------------------------------------------------------------------------------------------------------------------------------------------------------------------------------------------------------------------------------------------------------------------------------------------------------------------------|------------|
| <b>Fig. S1.</b> Schematic representation of the physical vapor deposition (PVD) technique.                                                                                                                                                                                                                                                                                                                           | <b>S3</b>  |
| <b>Fig. S2.</b> Schematic representation of the ovens and image of an individual oven.                                                                                                                                                                                                                                                                                                                               | <b>S3</b>  |
| <b>Fig. S3.</b> Schematic representation and images of the substrate support system.                                                                                                                                                                                                                                                                                                                                 | <b>S4</b>  |
| <b>Fig. S4.</b> Detailed morphology of the different microstructures fabricated by sequential PVD of perylene and ionic liquids on ITO-coated glass surfaces [ionic liquid/perylene/ITO].                                                                                                                                                                                                                            | <b>S5</b>  |
| <b>Fig. S5.</b> Detailed morphology of the different microstructures fabricated by inverted sequential PVD of perylene and ionic liquids on ITO-coated glass surfaces [perylene/ionic liquid/ITO].                                                                                                                                                                                                                   | <b>S6</b>  |
| <b>Fig. S6.</b> X-ray diffraction patterns of the ITO substrate, the perylene film, and the perylene film deposited onto droplets or a coalesced film of [C <sub>2</sub> C <sub>2</sub> im][NTf <sub>2</sub> ].                                                                                                                                                                                                      | <b>S7</b>  |
| <b>Fig. S7.</b> Predicted crystallite sizes, calculated through Scherrer equation and Williamson-Hall Plot, of the perylene film and the perylene film deposited onto a coalesced film or onto droplets of [C <sub>2</sub> C <sub>2</sub> im][NTf <sub>2</sub> ].                                                                                                                                                    | <b>S7</b>  |
| <b>Fig. S8.</b> Detailed morphology of the different microstructures fabricated by simultaneous PVD of perylene and ionic liquids on ITO-coated glass surfaces [(perylene + ionic liquid)/ITO].                                                                                                                                                                                                                      | <b>S8</b>  |
| <b>Fig. S9.</b> X-ray diffraction patterns of the ITO substrate, the perylene film, and the different microstructures/composites fabricated.                                                                                                                                                                                                                                                                         | <b>S9</b>  |
| <b>Fig. S10.</b> Predicted crystallite sizes, calculated through Scherrer equation and Williamson-Hall Plot, of the perylene film, the nanocomposites of perylene and [C <sub>2</sub> C <sub>2</sub> im][NTf <sub>2</sub> ], the nanocomposites of perylene and [C <sub>4</sub> C <sub>1</sub> im][NTf <sub>2</sub> ], and the nanocomposites of perylene and [C <sub>8</sub> C <sub>1</sub> im][NTf <sub>2</sub> ]. | <b>S9</b>  |
| <b>Fig. S11.</b> UV-vis absorption spectra of perylene films (deposited on ITO/glass) with different thicknesses.                                                                                                                                                                                                                                                                                                    | <b>S10</b> |
| <b>Fig. S12.</b> UV-vis absorption spectra of the solution medium (toluene and DCM).                                                                                                                                                                                                                                                                                                                                 | <b>S10</b> |
| <b>Fig. S13.</b> UV-vis absorption spectra of solutions of perylene obtained by using different solvents and UV-vis absorption spectra of perylene thin films covered with different ionic liquids.                                                                                                                                                                                                                  | <b>S11</b> |
| <b>Table S1.</b> Detailed experimental conditions for the PVD process of the various film architectures.                                                                                                                                                                                                                                                                                                             | <b>S12</b> |

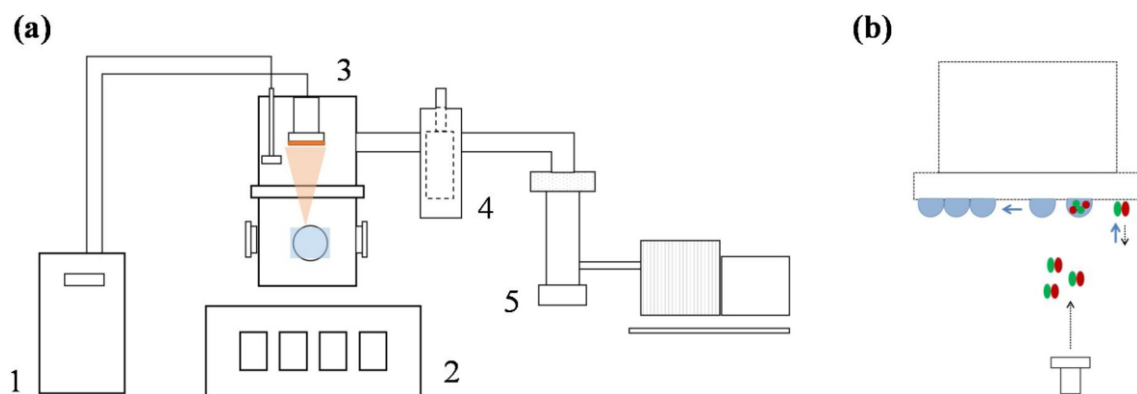

**Fig. S1.** Schematic representation of the physical vapor deposition (PVD) technique: (a) ThinFilmVD apparatus (1 – cooling system, 2 – instrumentation box, 3 – vacuum chamber, 4 – N<sub>2</sub> (l) metallic trap, 5 – vacuum pumping system); (b) schematic detail of the PVD/vacuum thermal evaporation process of ionic liquids. More details: *Appl. Surf. Sci.*, 2018, 428, 242 and *J. Chem. Eng. Data*, 2015, 60, 3776.

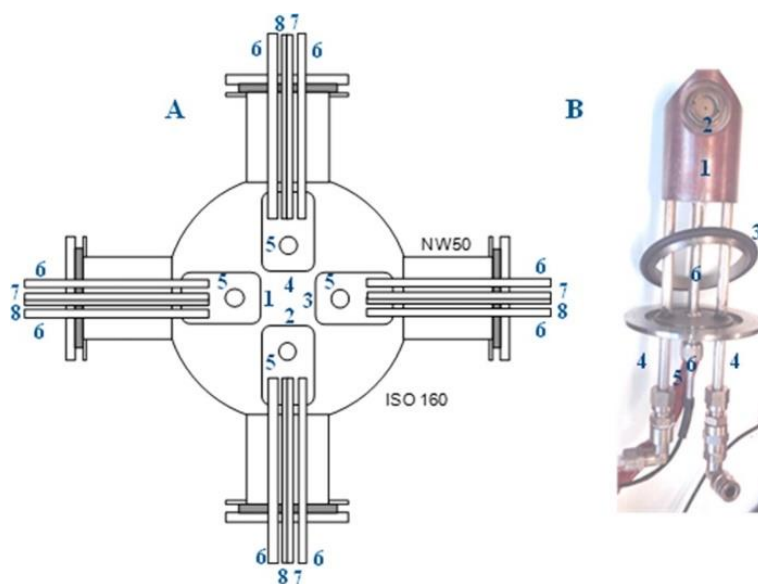

**Fig. S2.** A – Schematic representation of the ovens: 1, 2, 3, 4 – individual ovens; 5 – cavity of the Knudsen cell screwing; 6 – air cooling tube; 7 – heater; 8 – Pt100 sensor; B – Image of an individual oven (top view): 1 – copper block; 2 – Knudsen cell; 3 – Viton O-ring; 4 – cooling system; 5 – heater; 6 – Pt100. More details: *J. Chem. Eng. Data*, 2015, 60, 3776.

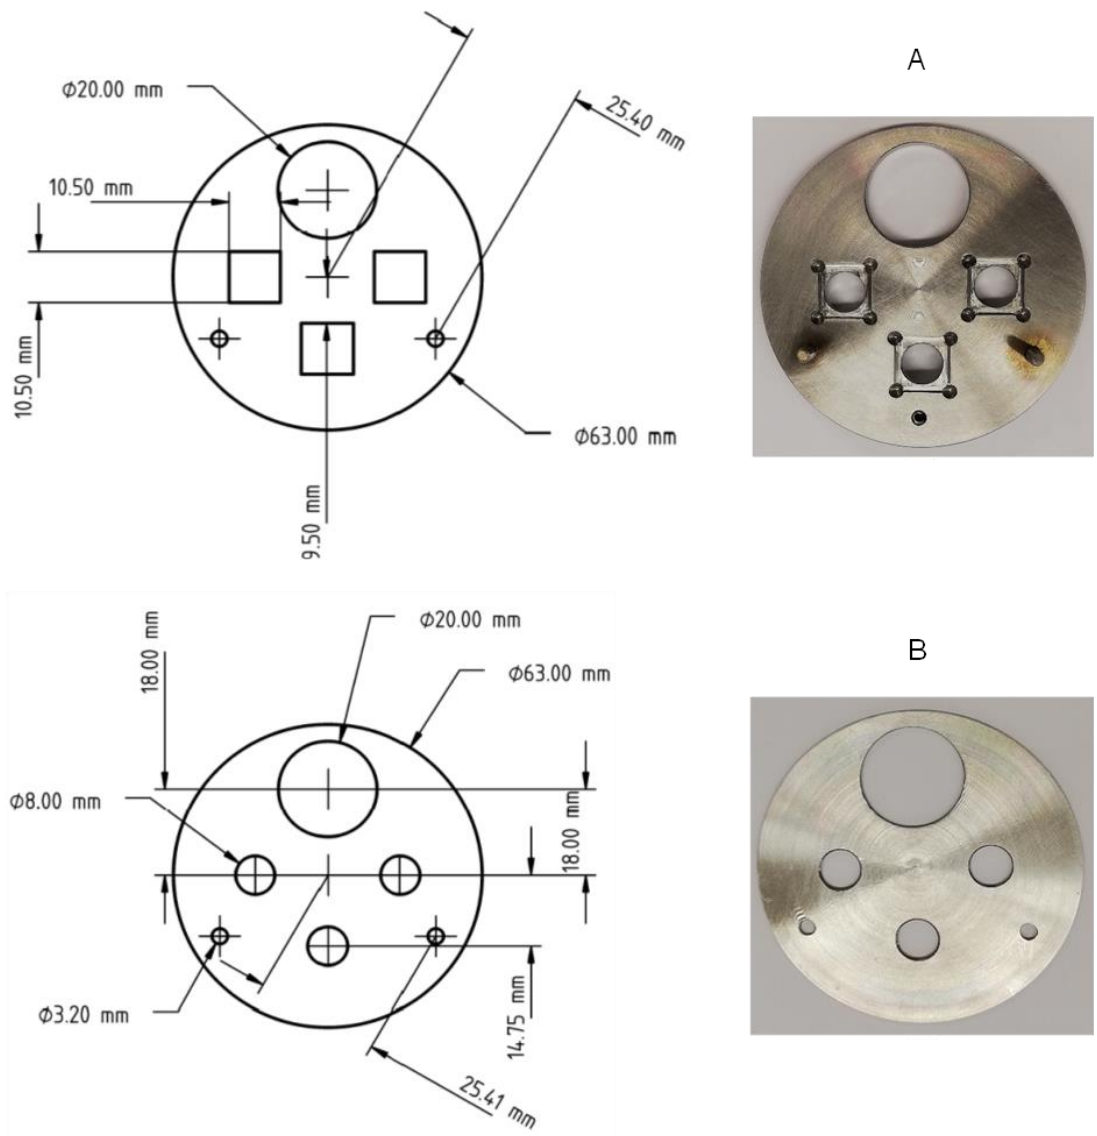

**Fig. S3.** Schematic representation (left) and images (right) of the substrate support system. The support was used for the sequential or simultaneous deposition processes of perylene and different ionic liquids: ionic liquid/perylene/indium tin oxide (ITO); perylene/ionic liquid/ITO; ionic liquid+perylene/ITO.

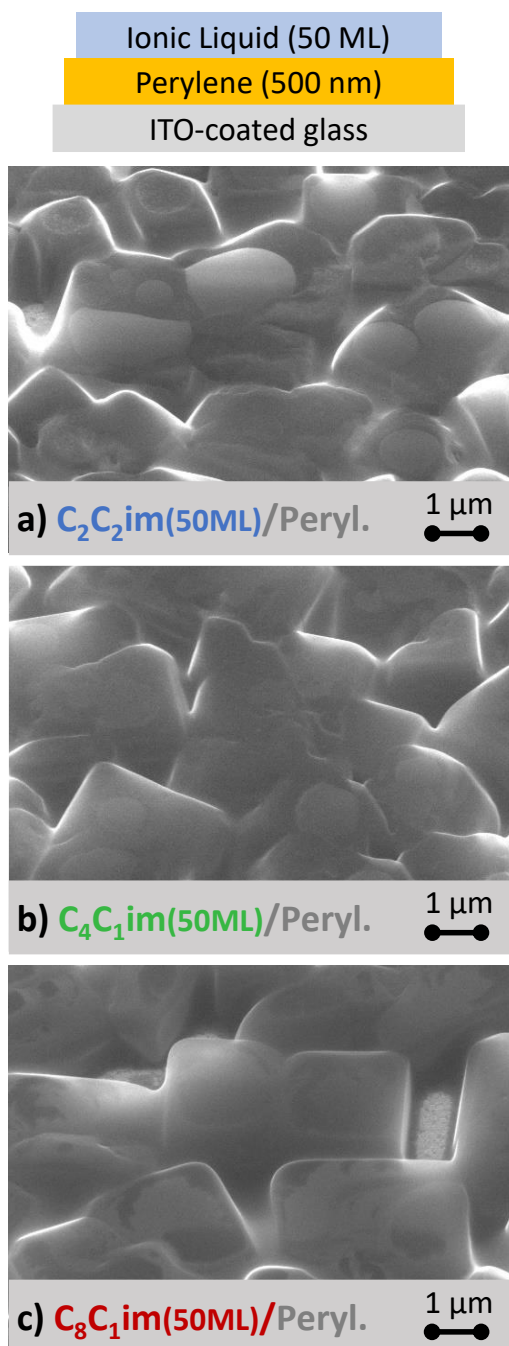

**Fig. S4.** Detailed morphology of the different microstructures fabricated by sequential PVD of perylene and ionic liquids on ITO-coated glass surfaces [ionic liquid/perylen/ITO]: micrographs of perylene (peryl.) film (500 nm) covered with 50 monolayers (ML) of  $[C_2C_2im][NTf_2]$  (a),  $[C_4C_1im][NTf_2]$  (b), and  $[C_8C_1im][NTf_2]$  (c). Lateral views at  $45^\circ$  were acquired through high-resolution scanning electron microscopy (SEM) by using a secondary electrons detector (SED). The organic film was found to have good wettability by ionic liquid films. The 3D perylene microstructures seem to be fully covered with a coalesced film (50 ML of thickness) of  $[C_2C_2im][NTf_2]$ ,  $[C_4C_1im][NTf_2]$ , and  $[C_8C_1im][NTf_2]$ . For perylene coated with 50 ML of  $[C_2C_2im][NTf_2]$  or  $[C_4C_1im][NTf_2]$ , the formation of 3D droplets (Figures 2a and 2b) of ILs can be perceived. These results indicate that the first layers of the short-chain alkylimidazolium-based ILs grow two-dimensionally onto the perylene film, followed by the three-dimensional growth of successive layers. A higher percentage of ITO exposed can be perceived for the perylene film coated with 50 ML of  $[C_8C_1im][NTf_2]$ , which highlights an even higher affinity of the organic film to the long-chain alkylimidazolium cations.

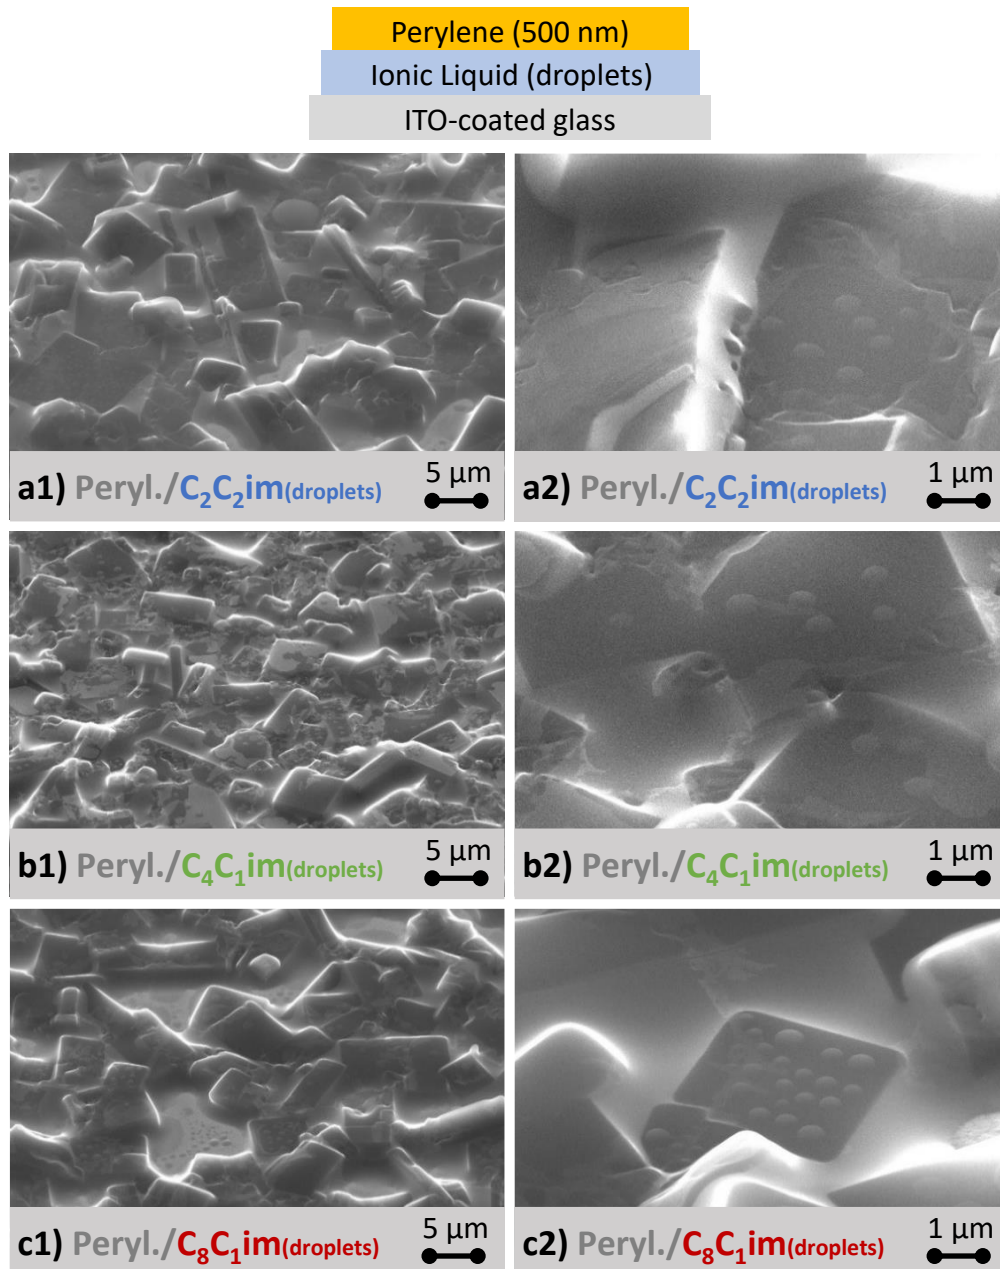

**Fig. S5.** Detailed morphology of the different microstructures fabricated by inverted sequential PVD of perylene and ionic liquids on ITO-coated glass surfaces [perylene/ionic liquid/ITO]: micrographs of a perylene (peryl.) film deposited onto droplets of [C<sub>2</sub>C<sub>2</sub>im][NTf<sub>2</sub>] (a1,a2), [C<sub>4</sub>C<sub>1</sub>im][NTf<sub>2</sub>] (b1,b2), and [C<sub>8</sub>C<sub>1</sub>im][NTf<sub>2</sub>] (c1,c2). Lateral views at 45° were acquired through high-resolution scanning electron microscopy (SEM) by using a secondary electrons detector (SED). The images obtained at higher magnification (a2, b2, c2) depict the presence of ionic liquid droplets on the top of the perylene crystals. This observation reveals that the perylene molecules might have penetrated inside the droplets where they formed the most stable clusters. As the ITO is a solvophobic surface to the ILs and there is a great interaction between the imidazolium cations and the perylene molecules, the ionic liquid accompanies the growth of the organic film. This effect is highly pronounced for [C<sub>8</sub>C<sub>1</sub>im][NTf<sub>2</sub>].

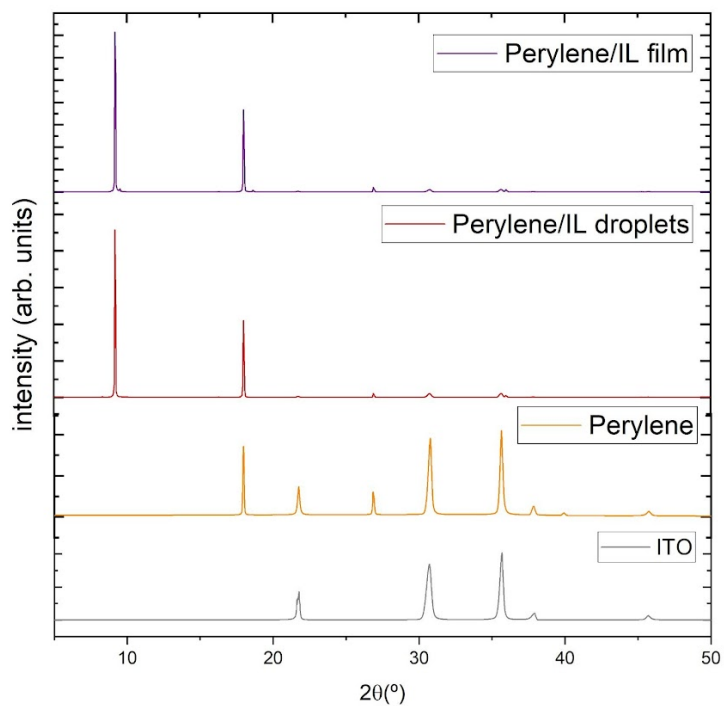

**Fig. S6.** X-ray diffraction patterns of the ITO substrate, the perylene film, and the perylene film deposited onto droplets (Perylene/IL droplets) or a coalesced film (Perylene/IL film) of  $[\text{C}_2\text{C}_2\text{im}][\text{NTf}_2]$ . The different plots are not scaled to better observe the difference between them.

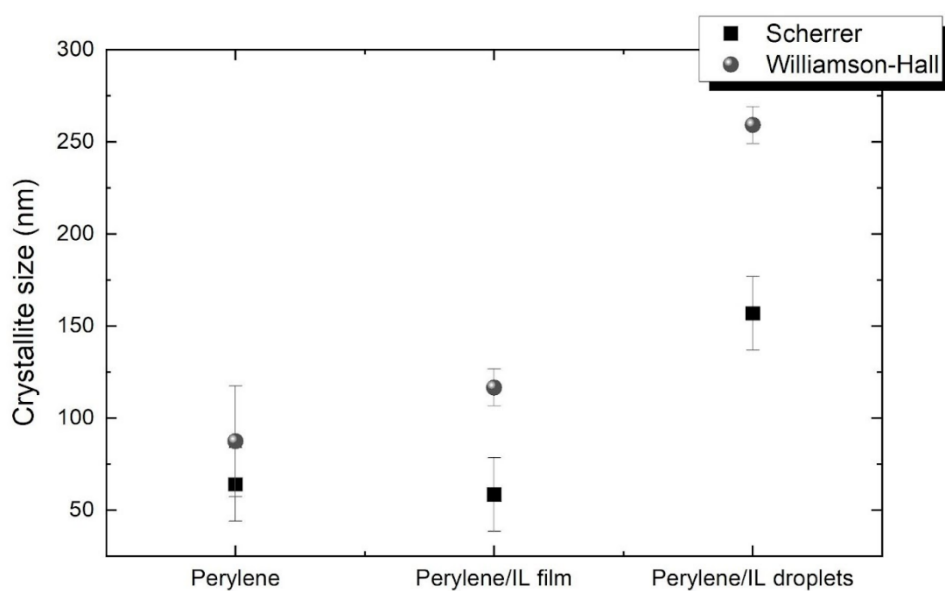

**Fig. S7.** Predicted crystallite sizes, calculated through Scherrer equation and Williamson-Hall Plot, of the perylene film and the perylene film deposited onto a coalesced film (Perylene/IL film) or onto droplets (Perylene/IL droplets) of  $[\text{C}_2\text{C}_2\text{im}][\text{NTf}_2]$ .

## Perylene + Ionic Liquid

ITO-coated glass

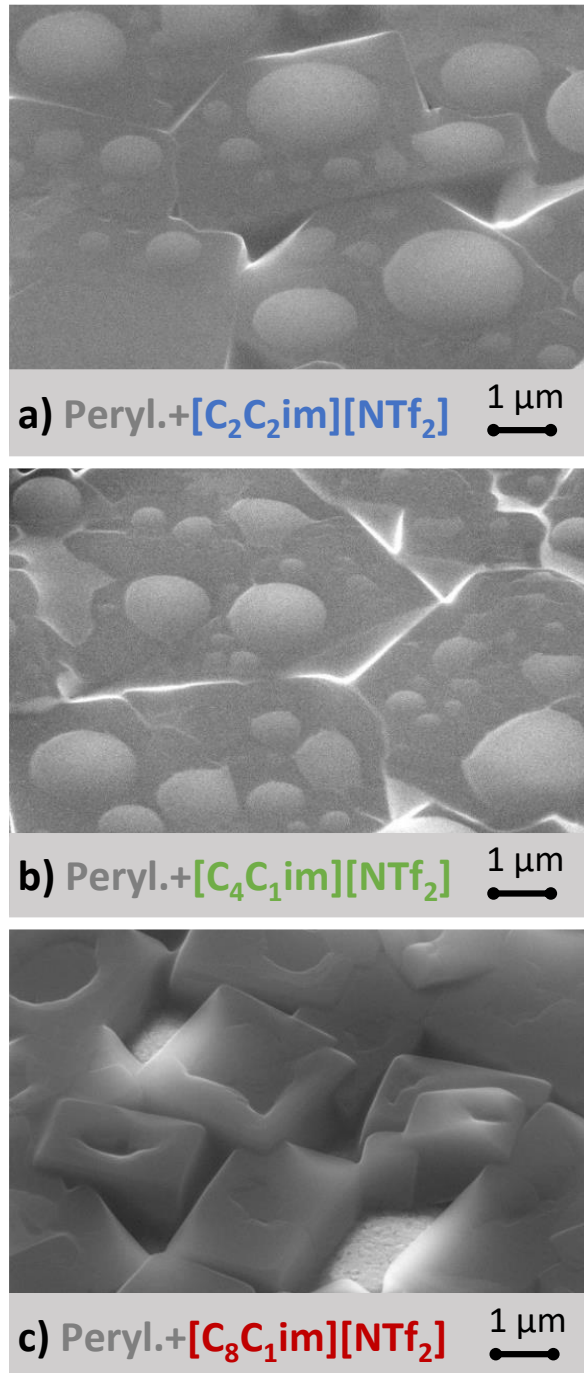

**Fig. S8.** Detailed morphology of the different microstructures fabricated by simultaneous PVD of perylene and ionic liquids on ITO-coated glass surfaces [(perylene + ionic liquid)/ITO]: micrographs of nanocomposites of perylene (peryl.) and  $[C_2C_2im][NTf_2]$  (a), nanocomposites of perylene and  $[C_4C_1im][NTf_2]$  (b1), and nanocomposites of perylene and  $[C_8C_1im][NTf_2]$  (c). Lateral views at  $45^\circ$  were acquired through high-resolution scanning electron microscopy (SEM) by using a secondary electrons detector (SED).



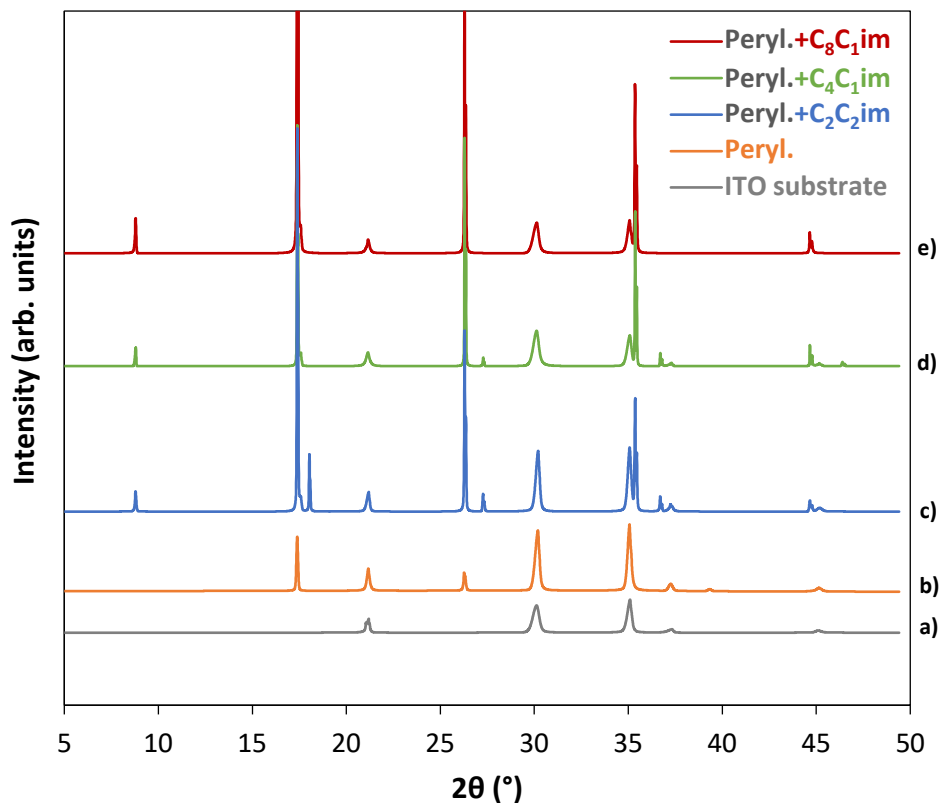

**Fig. S9.** X-ray diffraction patterns of the ITO substrate (a), the perylene (peryl.) film (b), and the different microstructures/composites fabricated: nanocomposites of perylene and [C<sub>2</sub>C<sub>2</sub>im][NTf<sub>2</sub>] (c); nanocomposites of perylene and [C<sub>4</sub>C<sub>1</sub>im][NTf<sub>2</sub>] (d); nanocomposites of perylene (peryl.) and [C<sub>8</sub>C<sub>1</sub>im][NTf<sub>2</sub>] (e).

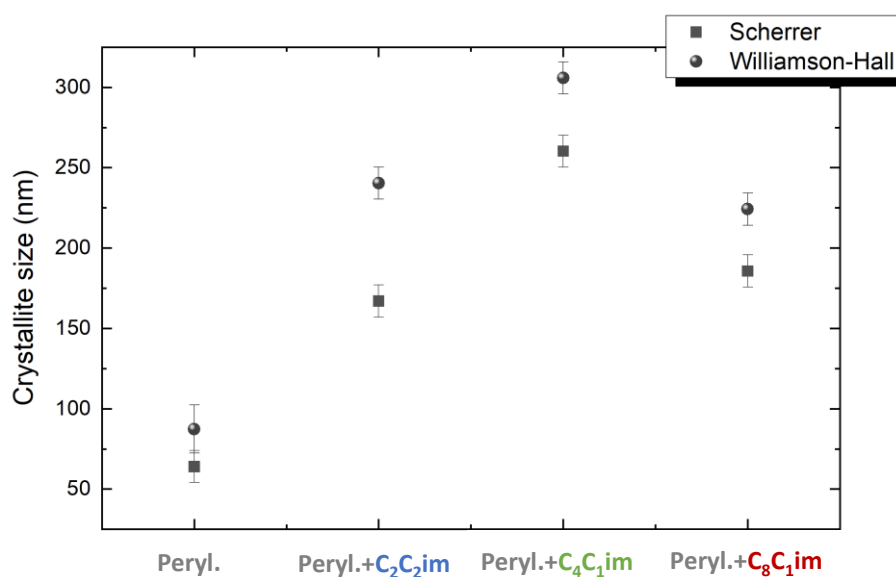

**Fig. S10.** Predicted crystallite sizes, calculated through Scherrer equation and Williamson-Hall Plot, of the perylene film (Peryl.), the nanocomposites of perylene and [C<sub>2</sub>C<sub>2</sub>im][NTf<sub>2</sub>] (Peryl.+C<sub>2</sub>C<sub>2</sub>im), the nanocomposites of perylene and [C<sub>4</sub>C<sub>1</sub>im][NTf<sub>2</sub>] (Peryl.+ C<sub>4</sub>C<sub>1</sub>im), and the nanocomposites of perylene and [C<sub>8</sub>C<sub>1</sub>im][NTf<sub>2</sub>] (Peryl.+ C<sub>8</sub>C<sub>1</sub>im).

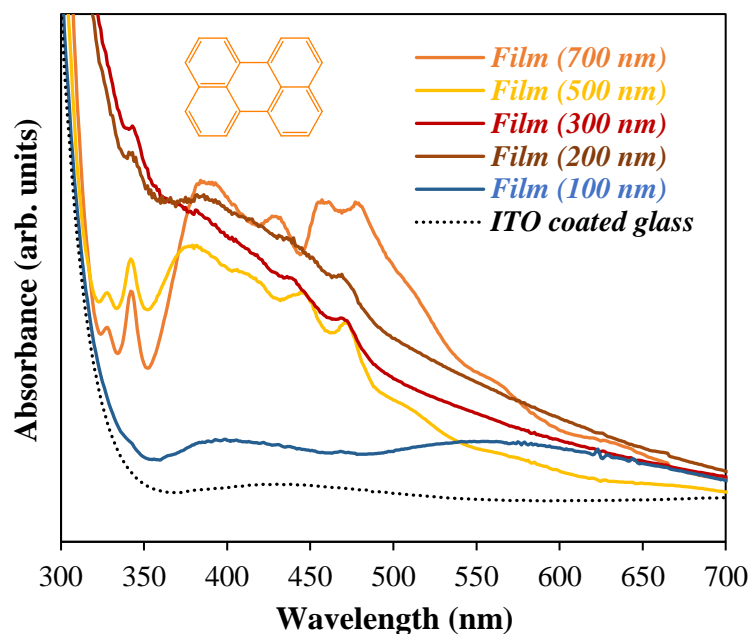

**Fig. S11.** UV-vis absorption spectra of perylene films (deposited on ITO/glass) with different thicknesses. The spectrum of the ITO-coated glass substrate (ITO/glass) is presented for comparison. These measurements were made in perylene films kept at ambient conditions (inside a box for a long time, > 1 month). As expected, peaks with higher absorbance were observed for the thicker perylene films.

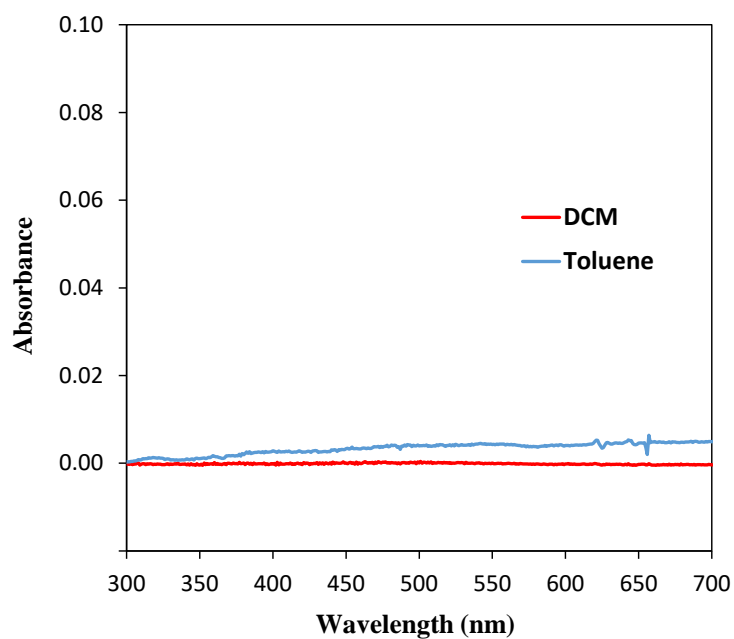

**Fig. S12.** UV-vis absorption spectra, recorded at  $T = 298.15$  K, of the solution medium (toluene and DCM).

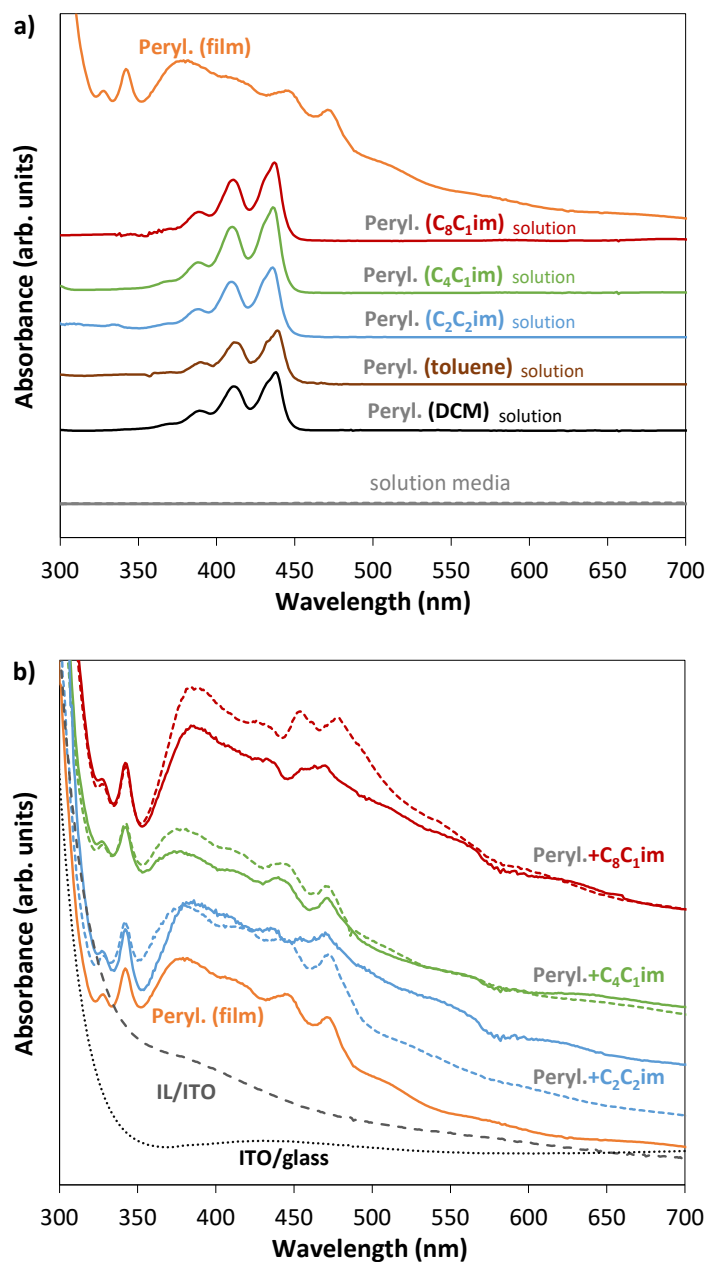

**Fig. S13.** UV-vis absorption spectra (a), recorded at  $T = 298.15$  K, for solutions of perylene ( $[\text{peryl.}] \approx 10^{-5}$  mol·dm<sup>-3</sup>) obtained by using different solvents: DCM (Peryl. (DCM)); toluene (Peryl. (toluene)); [C<sub>2</sub>C<sub>2</sub>im][NTf<sub>2</sub>] (Peryl. (C<sub>2</sub>C<sub>2</sub>im)); [C<sub>4</sub>C<sub>1</sub>im][NTf<sub>2</sub>] (Peryl. (C<sub>4</sub>C<sub>1</sub>im)); [C<sub>8</sub>C<sub>1</sub>im][NTf<sub>2</sub>] (Peryl. (C<sub>8</sub>C<sub>1</sub>im)). UV-vis absorption spectra (b) of perylene thin films (500 nm of thickness) covered with 400 monolayers (ML) of different ionic liquids (C<sub>8</sub>C<sub>1</sub>im; C<sub>4</sub>C<sub>1</sub>im, and C<sub>2</sub>C<sub>2</sub>im) (solid lines) and spectra of perylene films deposited simultaneously with the same ionic liquids (dashed lines). Spectra of the solution media (DCM and toluene), of a perylene film (Peryl.), the ionic liquid droplets deposited onto ITO (IL/ITO), and the ITO-coated glass substrate (ITO/glass) are presented for comparison.

**Table S1.** Detailed experimental conditions for the PVD process of the various film architectures: effusion temperature ( $T_{\text{eff}}$ ); equilibrium vapor pressure ( $EVP$ ); mass flow rate at the Knudsen effusion cell orifice ( $\Phi$  (Knudsen cell)); mass flow rate at the substrate surface ( $\Phi$  (QCM)) and corresponding deposition rate in  $\text{\AA}\cdot\text{s}^{-1}$ ; geometric factor; deposition time; thin film thickness (nm or ML, ML = monolayers).

| Precursor                                                                                                   | $T_{\text{eff}}$ | $EVP$          | $\Phi$<br>(Knudsen cell)                           | $\Phi$<br>(QCM)                                  | Geometric<br>factor | Deposition<br>rate             | Deposition<br>time | Thickness        |
|-------------------------------------------------------------------------------------------------------------|------------------|----------------|----------------------------------------------------|--------------------------------------------------|---------------------|--------------------------------|--------------------|------------------|
|                                                                                                             | K                | Pa             | $\mu\text{g}\cdot\text{cm}^{-2}\cdot\text{s}^{-1}$ | $\text{ng}\cdot\text{cm}^{-2}\cdot\text{s}^{-1}$ |                     | $\text{\AA}\cdot\text{s}^{-1}$ | min                |                  |
| <b>Sequential deposition: Ionic Liquid (50 or 400 ML) / Perylene (500 nm)   substrate: ITO</b>              |                  |                |                                                    |                                                  |                     |                                |                    |                  |
| Perylene                                                                                                    | 443              | $\approx 0.72$ | $\approx 215$                                      | $10.9 \pm 0.4$                                   | $5 \times 10^{-5}$  | $0.81 \pm 0.03$                | 103                | 500 nm           |
| [C <sub>2</sub> C <sub>2</sub> im][NTf <sub>2</sub> ]                                                       | 478              | $\approx 0.09$ | $\approx 33$                                       | $8.1 \pm 0.4$                                    | $2 \times 10^{-4}$  | $0.55 \pm 0.03$                | 12                 | 50 ML            |
| [C <sub>2</sub> C <sub>2</sub> im][NTf <sub>2</sub> ]                                                       | 478              | $\approx 0.09$ | $\approx 33$                                       | $9.6 \pm 1.2$                                    | $3 \times 10^{-4}$  | $0.65 \pm 0.08$                | 79                 | 400 ML           |
| [C <sub>4</sub> C <sub>1</sub> im][NTf <sub>2</sub> ]                                                       | 483              | $\approx 0.08$ | $\approx 29$                                       | $7.5 \pm 0.7$                                    | $3 \times 10^{-4}$  | $0.52 \pm 0.05$                | 13                 | 50 ML            |
| [C <sub>4</sub> C <sub>1</sub> im][NTf <sub>2</sub> ]                                                       | 483              | $\approx 0.08$ | $\approx 29$                                       | $9.1 \pm 2.3$                                    | $3 \times 10^{-4}$  | $0.63 \pm 0.16$                | 83                 | 400 ML           |
| [C <sub>8</sub> C <sub>1</sub> im][NTf <sub>2</sub> ]                                                       | 498              | $\approx 0.12$ | $\approx 46$                                       | $5.1 \pm 1.7$                                    | $1 \times 10^{-4}$  | $0.39 \pm 0.13$                | 18                 | 50 ML            |
| [C <sub>8</sub> C <sub>1</sub> im][NTf <sub>2</sub> ]                                                       | 498              | $\approx 0.12$ | $\approx 46$                                       | $6.2 \pm 1.5$                                    | $1 \times 10^{-4}$  | $0.47 \pm 0.11$                | 120                | 400 ML           |
| <b>Inverted sequential deposition: Perylene (20, 50 or 500 nm) / Ionic liquid (200 ML)   substrate: ITO</b> |                  |                |                                                    |                                                  |                     |                                |                    |                  |
| Perylene                                                                                                    | 443              | $\approx 0.72$ | $\approx 215$                                      | $11.5 \pm 0.4$                                   | $5 \times 10^{-5}$  | $0.85 \pm 0.03$                | 4                  | 20 nm            |
| Perylene                                                                                                    | 443              | $\approx 0.72$ | $\approx 215$                                      | $11.1 \pm 0.4$                                   | $5 \times 10^{-5}$  | $0.82 \pm 0.03$                | 10                 | 50 nm            |
| Perylene                                                                                                    | 443              | $\approx 0.72$ | $\approx 215$                                      | $11.6 \pm 0.4$                                   | $5 \times 10^{-5}$  | $0.86 \pm 0.03$                | 97                 | 500 nm           |
| [C <sub>2</sub> C <sub>2</sub> im][NTf <sub>2</sub> ]                                                       | 478              | $\approx 0.09$ | $\approx 33$                                       | $6.2 \pm 2.2$                                    | $2 \times 10^{-4}$  | $0.42 \pm 0.15$                | 61                 | 200 ML           |
| [C <sub>4</sub> C <sub>1</sub> im][NTf <sub>2</sub> ]                                                       | 483              | $\approx 0.08$ | $\approx 29$                                       | $7.1 \pm 1.3$                                    | $2 \times 10^{-4}$  | $0.49 \pm 0.09$                | 53                 | 200 ML           |
| [C <sub>8</sub> C <sub>1</sub> im][NTf <sub>2</sub> ]                                                       | 498              | $\approx 0.12$ | $\approx 46$                                       | $5.5 \pm 0.4$                                    | $1 \times 10^{-4}$  | $0.42 \pm 0.03$                | 67                 | 200 ML           |
| <b>Simultaneous deposition: Perylene + Ionic liquid (<math>\approx 500</math> nm)   substrate: ITO</b>      |                  |                |                                                    |                                                  |                     |                                |                    |                  |
| Perylene                                                                                                    | 443              | $\approx 0.72$ | $\approx 215$                                      | $14.9 \pm 1.6$                                   |                     | $1.1 \pm 0.1$                  | 76                 | $\approx 500$ nm |
| [C <sub>2</sub> C <sub>2</sub> im][NTf <sub>2</sub> ]                                                       | 478              | $\approx 0.09$ | $\approx 33$                                       |                                                  |                     |                                |                    |                  |
| Perylene                                                                                                    | 443              | $\approx 0.72$ | $\approx 215$                                      | $13.9 \pm 2.0$                                   |                     | $1.0 \pm 0.2$                  | 81                 | $\approx 500$ nm |
| [C <sub>4</sub> C <sub>1</sub> im][NTf <sub>2</sub> ]                                                       | 483              | $\approx 0.08$ | $\approx 29$                                       |                                                  |                     |                                |                    |                  |
| Perylene                                                                                                    | 443              | $\approx 0.72$ | $\approx 215$                                      | $16.2 \pm 1.8$                                   |                     | $1.2 \pm 0.1$                  | 69                 | $\approx 500$ nm |
| [C <sub>8</sub> C <sub>1</sub> im][NTf <sub>2</sub> ]                                                       | 498              | $\approx 0.12$ | $\approx 46$                                       |                                                  |                     |                                |                    |                  |
